# Supplementary material for: Synthesis of molecularly imprinted polymer with a methacrylate derivative monomer for the isolation of ethyl p -methoxycinnamate as an active compound from Kaempferia galanga L. extracts
Source: Royal Society of Chemistry journal article supplement (doi:10.1039/d4ra01018c), 2024-01-01
Supplement: d4ra01018c1.pdf [file d4ra01018c1.pdf]

## Supplementary Information

# Synthesis of Molecularly Imprinted Polymer with Methacrylate Derivative Monomer for Isolation of Ethyl *p*-Methoxycinnamate as an Active Compound from *Kaempferia galanga* L. Extracts

Marisa Dwi Ariani,<sup>a</sup> Ade Zuhrotun,<sup>b</sup> Panagiotis Manesiotis,<sup>c</sup> and Aliya Nur Hasanah<sup>\*a,d</sup>

---

<sup>a</sup> Pharmaceutical Analysis and Medicinal Chemistry Department, Faculty of Pharmacy, Universitas Padjadjaran, Sumedang, Bandung 45463, West Java, Indonesia.

<sup>b</sup> Pharmacy Biology Department, Faculty of Pharmacy, Universitas Padjadjaran, Sumedang, Bandung 45463, West Java, Indonesia

<sup>c</sup> School of Chemistry and Chemical Engineering, Queens of Belfast, Belfast, BT9 5 AG, UK

<sup>d</sup> Drug Development Study Centre, Faculty of Pharmacy, Universitas Padjadjaran, Sumedang, Bandung 45463, West Java, Indonesia

---

\*Corresponding author, e-mail: aliya.n.hasanah@unpad.ac.id

† Footnotes relating to the title and/or authors should appear here.

**Figure S1 Monomer Structure**

**Figure S2 EPMC UV spectrum at maximum wavelength**

**Figure S3 Calibration curve for EPMC content in extract**

**Figure S4 Benesi-Hildebrand regression linear curve**

**Figure S5 Job's Plot xH calculation**

**Figure S6 EDS analysis of MIP and NIP**

**Figure S7 Linear regression curve of Freundlich and Langmuir Isotherm**

**Table S1 EPMC contain in *Kaempferia galanga* L. rhizome extract**

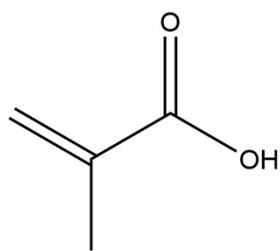

methacrylic acid

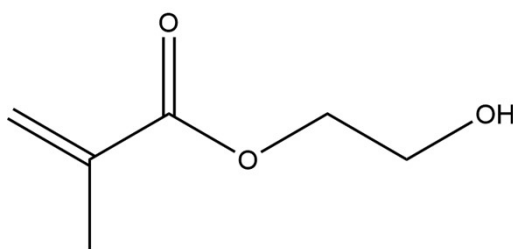

2-hydroxyethyl Methacrylate

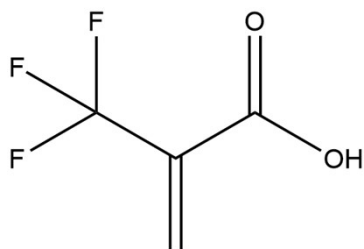

2-(Trifluoromethyl)acrylic acid

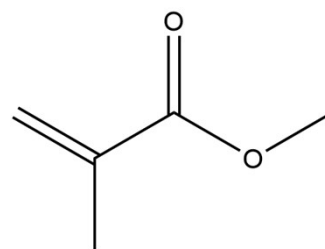

Methyl Methacrylate

**Fig. S1.** Monomer Structure

---

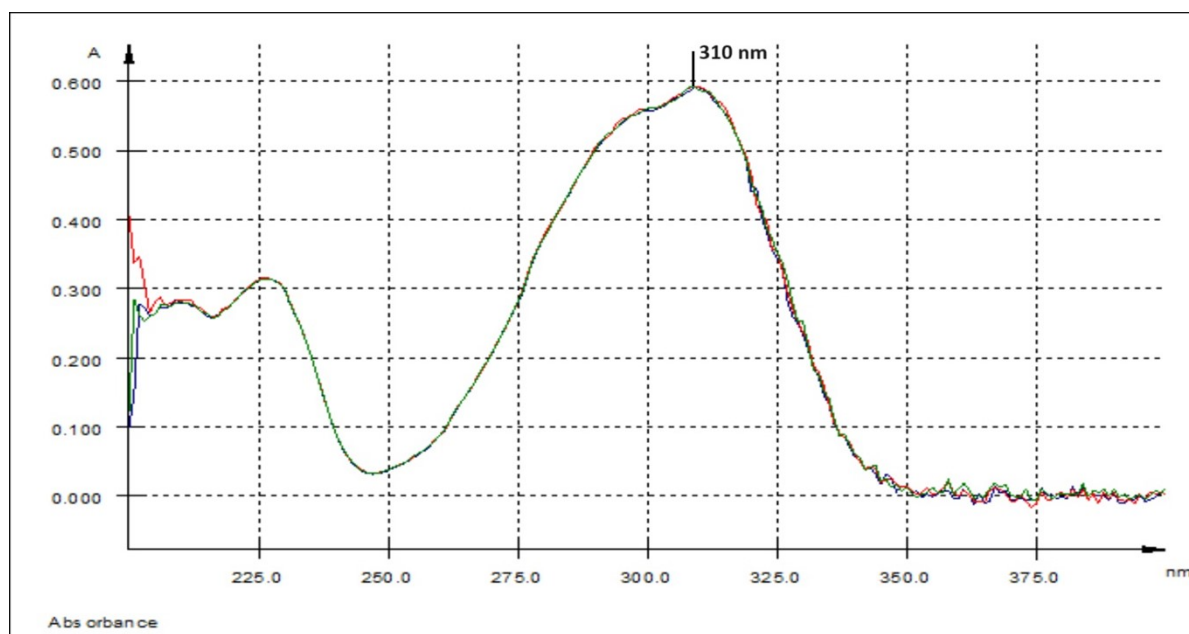

**Fig. S2.** EPMC UV spectrum at maximum wavelength

---

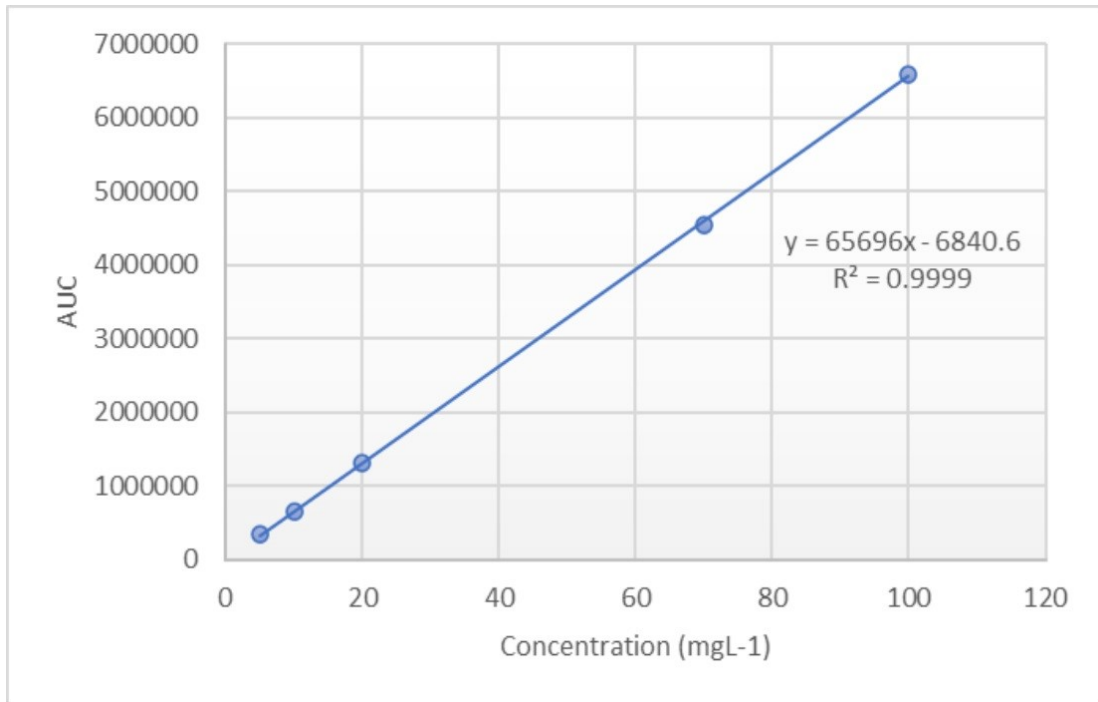

**Fig. S3.** Calibration curve for EPMC content in extract

---

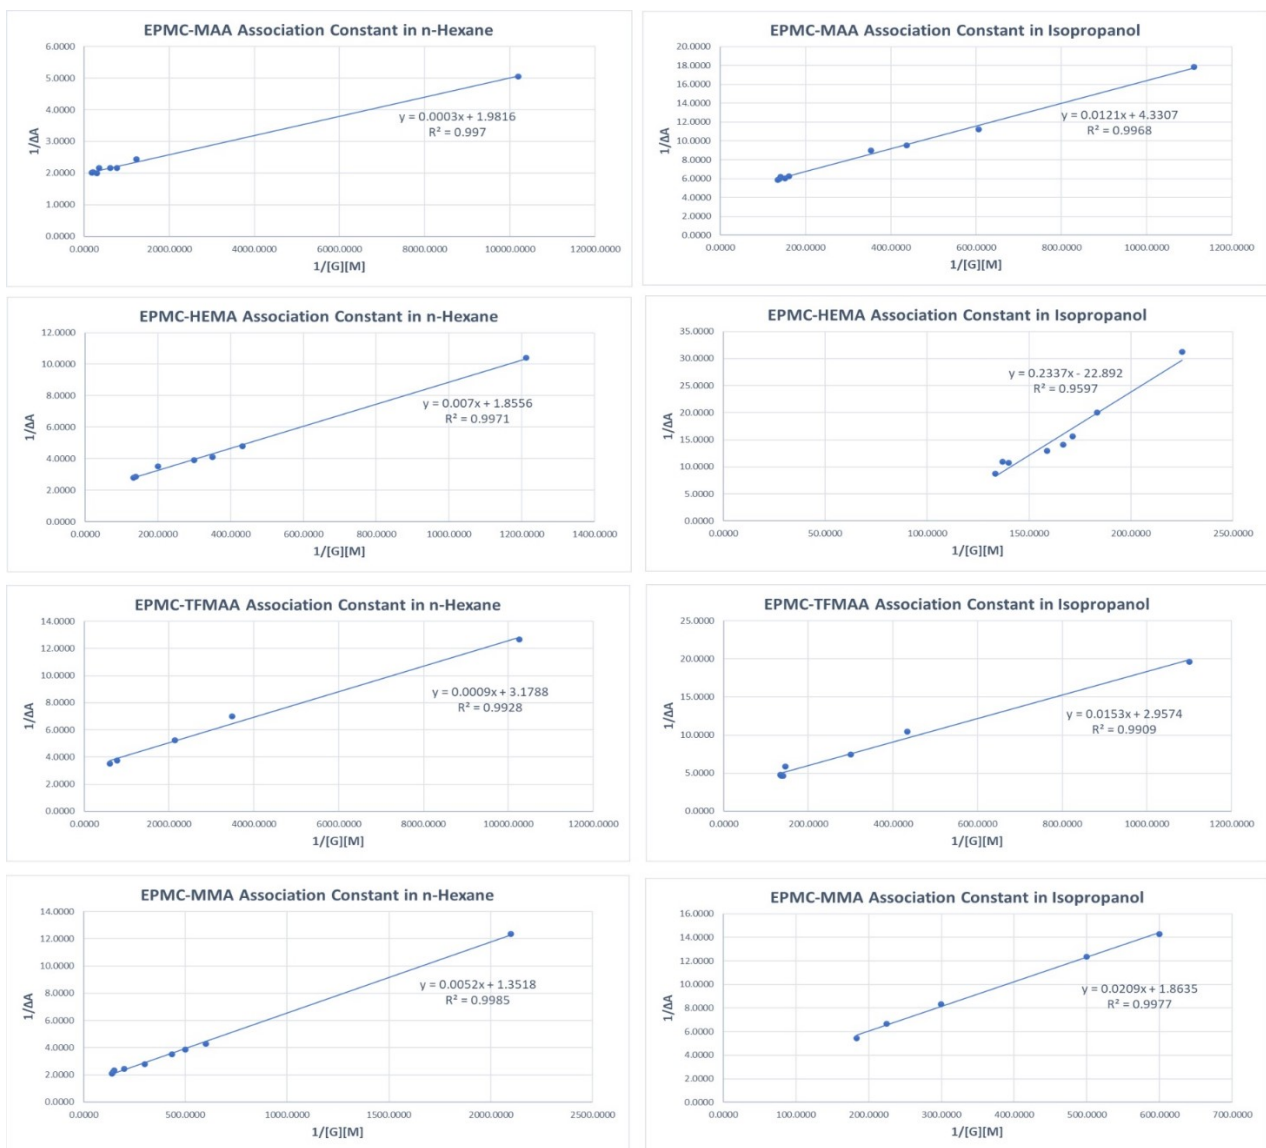

**Fig. S4.** Benesi-Hildebrand regression linear curve

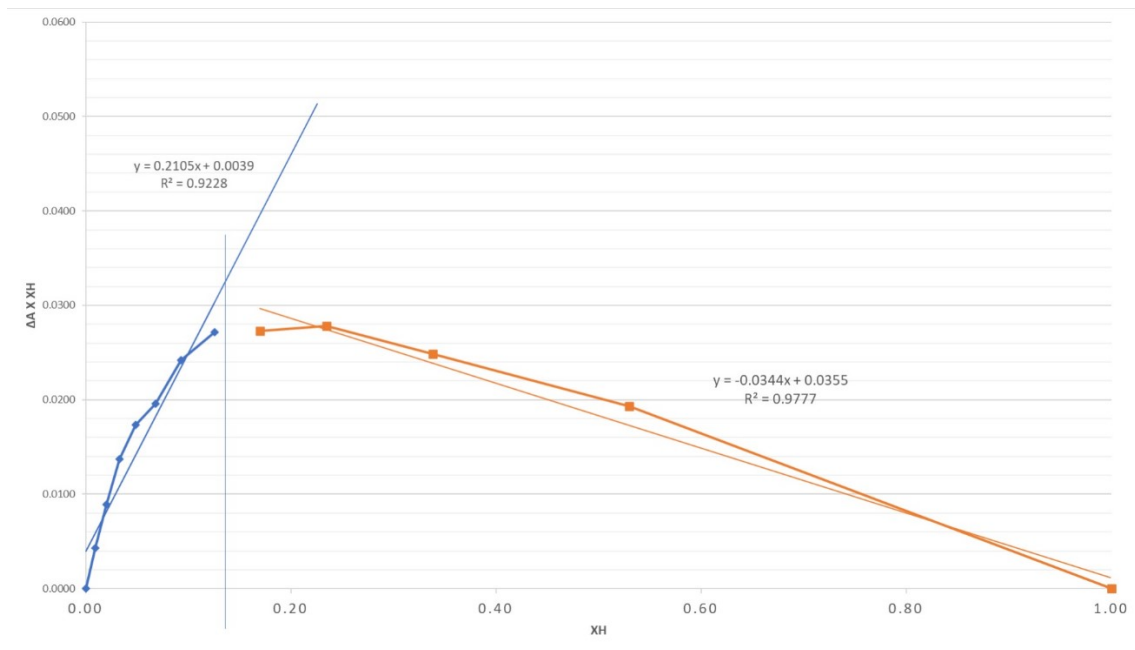

**Fig. S5.** Job's Plot xH calculation

Eq (1) [G] ...  $y = 0.2105x + 0.0039$

Eq (2) [H]...  $y = -0.0344x + 0.0355$

$$0 = 0.2449x - 0.0316$$

$$x = 0.129$$

$$x_H = 0.129$$

$$x_G = 1 - 0.129 = 0.871$$

$$H:G = 0.129:0.871$$

$$H:G = 1:6.8 \text{ rounded up to } 1:7$$

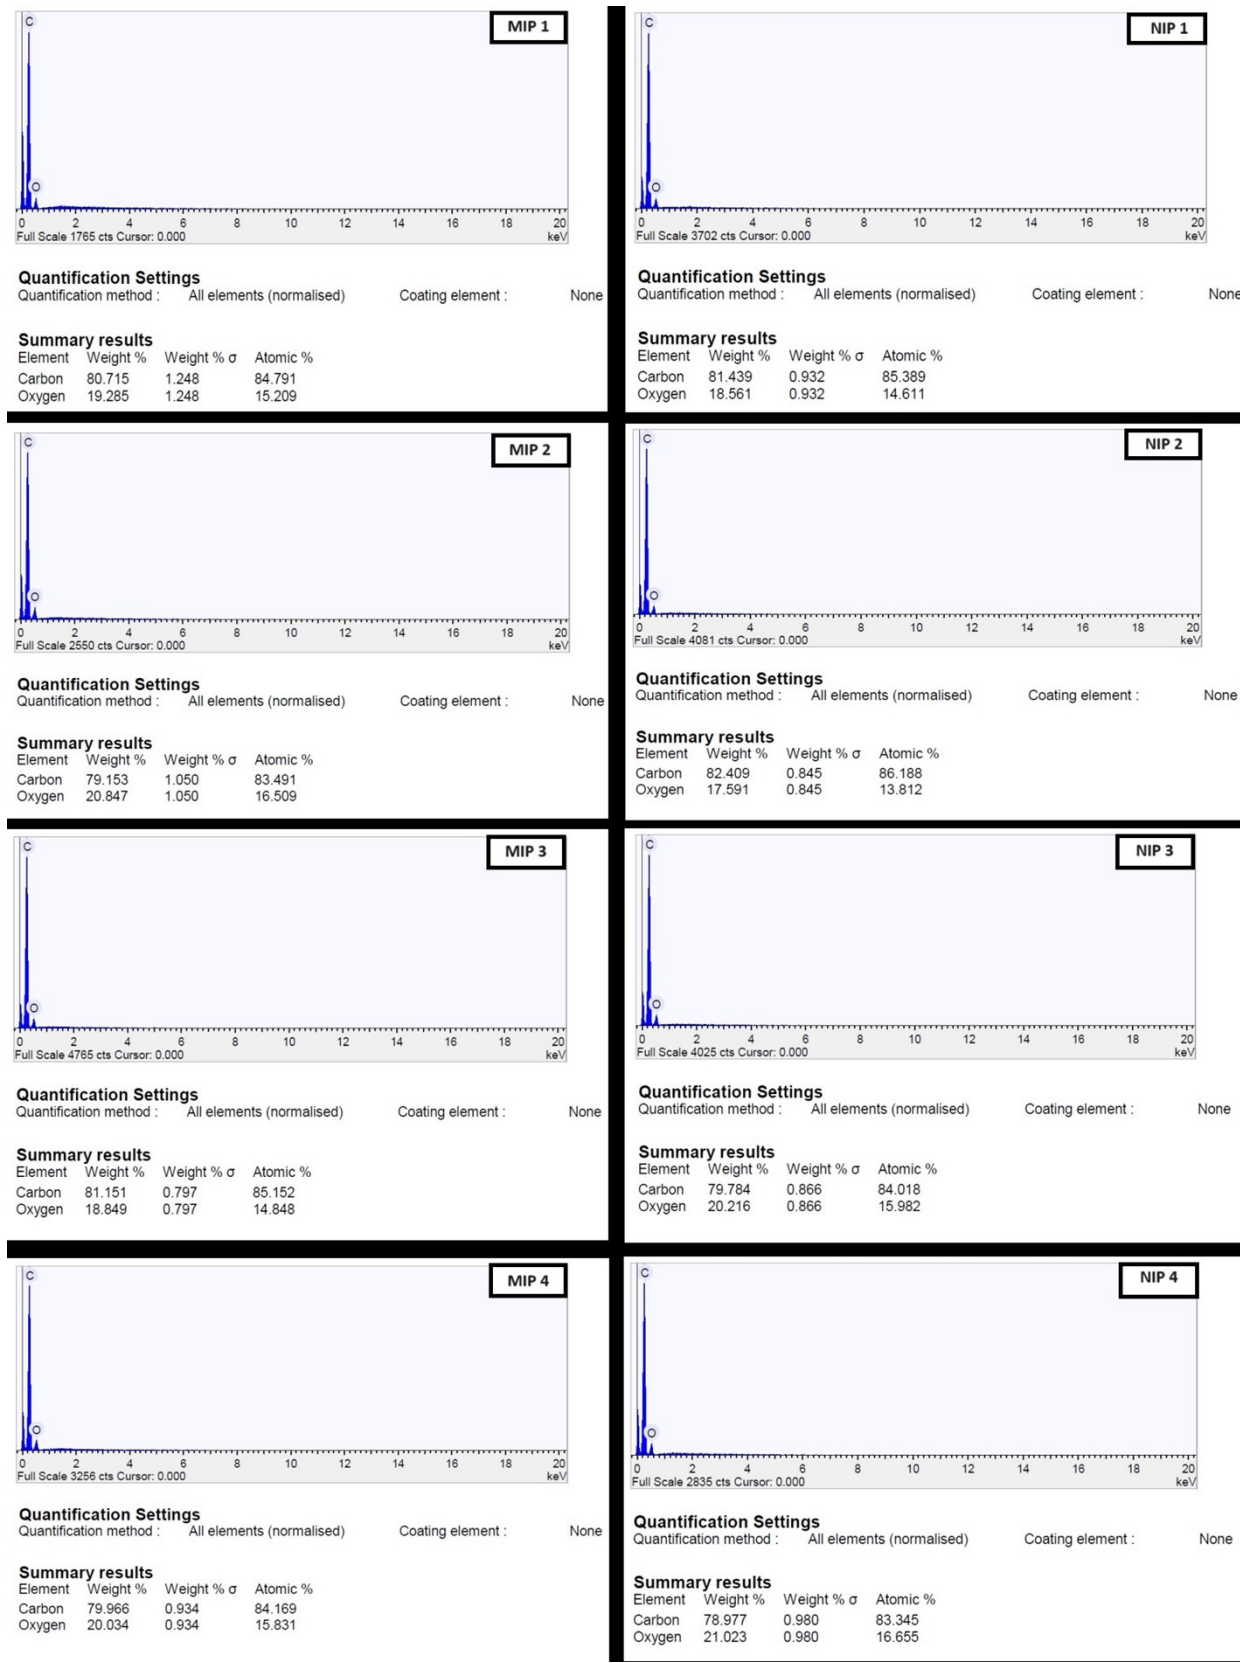

Fig. S6. EDS analysis of MIP and NIP

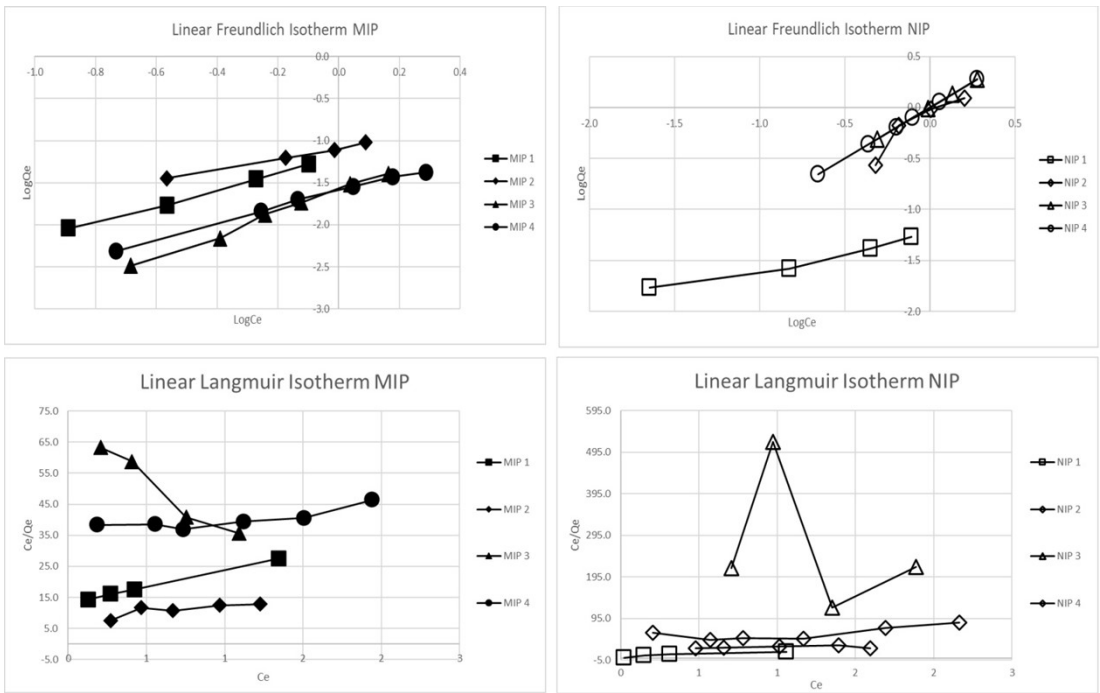

**Fig. S7.** Linear regression curve of Freundlich and Langmuir Isotherm

**Table S1.** EPMC contain in *Kaempferia galanga* L. rhizome extract (n=3)

| Extraction<br>(100 mgL <sup>-1</sup> ) | Mass<br>(mg) | AUC     | Average<br>of AUC | Assay<br>(mgL <sup>-1</sup> ) | %Assay<br>(%) | Average of<br>AUC (%) | RSD (%) |
|----------------------------------------|--------------|---------|-------------------|-------------------------------|---------------|-----------------------|---------|
| Ethyl<br>Acetate                       | 100.4        | 5728684 | 5667812           | 87.10                         | 86.75         | 85.83                 | 3.49    |
|                                        |              | 5827755 |                   | 88.60                         | 88.25         |                       |         |
|                                        |              | 5446998 |                   | 82.81                         | 82.48         |                       |         |
| Ethanol                                | 100.5        | 4781032 | 4694456           | 72.67                         | 72.31         | 71.00                 | 1.85    |
|                                        |              | 4607880 |                   | 70.03                         | 69.69         |                       |         |
|                                        |              | 4694456 |                   | 71.35                         | 71.00         |                       |         |
| n-Hexane                               | 102.4        | 6429813 | 6471957           | 97.77                         | 95.48         | 96.10                 | 1.11    |
|                                        |              | 6554742 |                   | 99.67                         | 97.33         |                       |         |
|                                        |              | 6431317 |                   | 97.79                         | 95.50         |                       |         |
